# Supplementary material for: Decellularization of human stromal refractive lenticules for corneal tissue engineering
Source: PubMed Central journal article supplement (PMC4876320; doi:10.1038/srep26339), 2016-05-23
Supplement: srep26339-s1.pdf [file srep26339-s1.pdf]

## **Decellularization of human stromal refractive lenticles for corneal tissue engineering**

Gary Hin-Fai Yam, Nur Zahirah Binte M Yusoff, Tze-Wei Gwen, Melina Setiawan, Xiao-Wen Lee, Yu-Chi Liu & Jodhbir S Mehta

### **Supplementary Information**

**Supplementary Table 1. Donor cornea information**

| <b>Donor cornea no.</b> | <b>Gender /Age</b> | <b>Time to Preservation</b> | <b>Cause of Death</b>  | <b>Use in Figures</b> |
|-------------------------|--------------------|-----------------------------|------------------------|-----------------------|
| 1                       | F/9                | 1 day                       | Head trauma            | 1                     |
| 2                       | F/9                | 1 day                       | Head trauma            | 1                     |
| 3                       | M/18               | 1 day                       | Motor vehicle accident | 2, 3                  |
| 4                       | M/18               | 1 day                       | Motor vehicle accident | 2, 3                  |
| 5                       | F/31               | 1 day                       | Motor vehicle accident | 1, 2, 3               |
| 6                       | F/31               | 1 day                       | Motor vehicle accident | 1, 2, 3               |
| 7                       | M/24               | 1 day                       | Motor vehicle accident | 2, 3, 4               |
| 8                       | M/71               | <1 day                      | Acute cardiac crisis   | 2, 3                  |
| 9                       | M/71               | <1 day                      | Acute cardiac crisis   | 2, 5, 6               |
| 10                      | M/24               | 1 day                       | Motor vehicle accident | 2, 3, 4               |
| 11                      | F/22               | <1 day                      | Overdose               | 2, 3                  |
| 12                      | F/22               | <1 day                      | Overdose               | 2, 6                  |

Donor age ranged from 9 to 71 years old with a median age of 24 year old. The time taken from death of donor to preservation in Optisol GS was less than a day and the time to femtosecond laser cut was between 3 to 16 days.

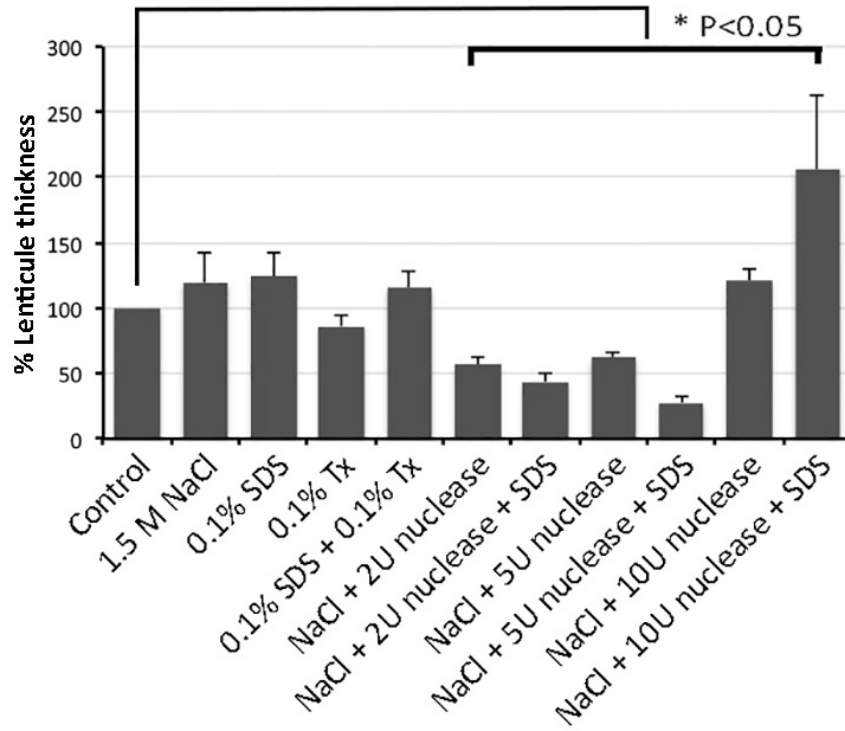

**Supplementary Figure S1.** Histogram showing lenticule thickness after decellularization. Data are presented as mean and SD and compared to control (100% thickness). Nuclease treatment resulted in significantly variable thickness ( $P < 0.05$ , Mann-Whitney U test).

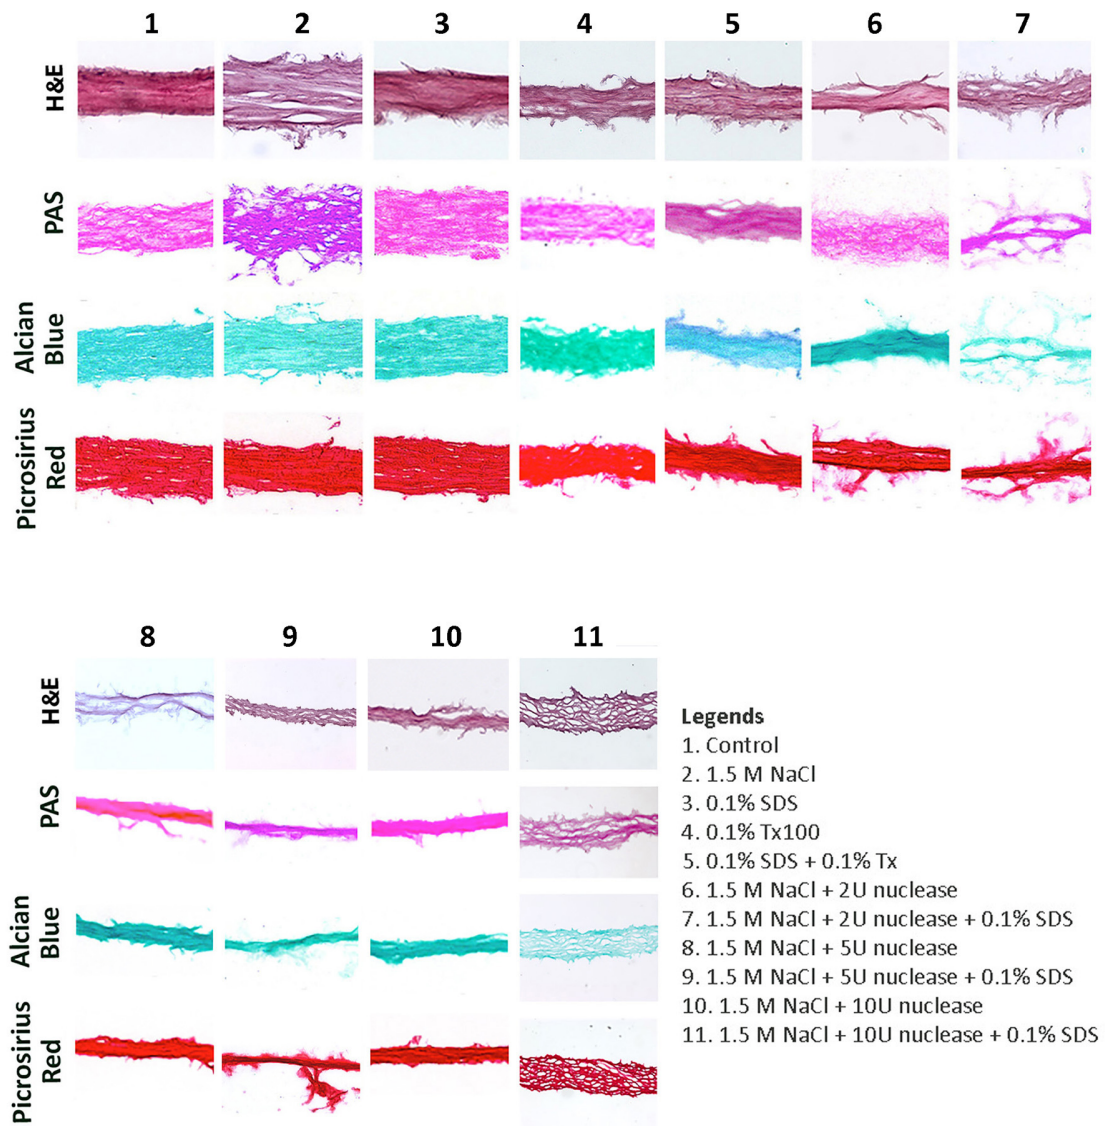

**Supplementary Figure S2.** Representative pictures of control and decellularized lenticules after histochemistry using hematoxylin-eosin (H&E), periodic acid-Schiff (PAS), alcian blue and picrosirius red staining.

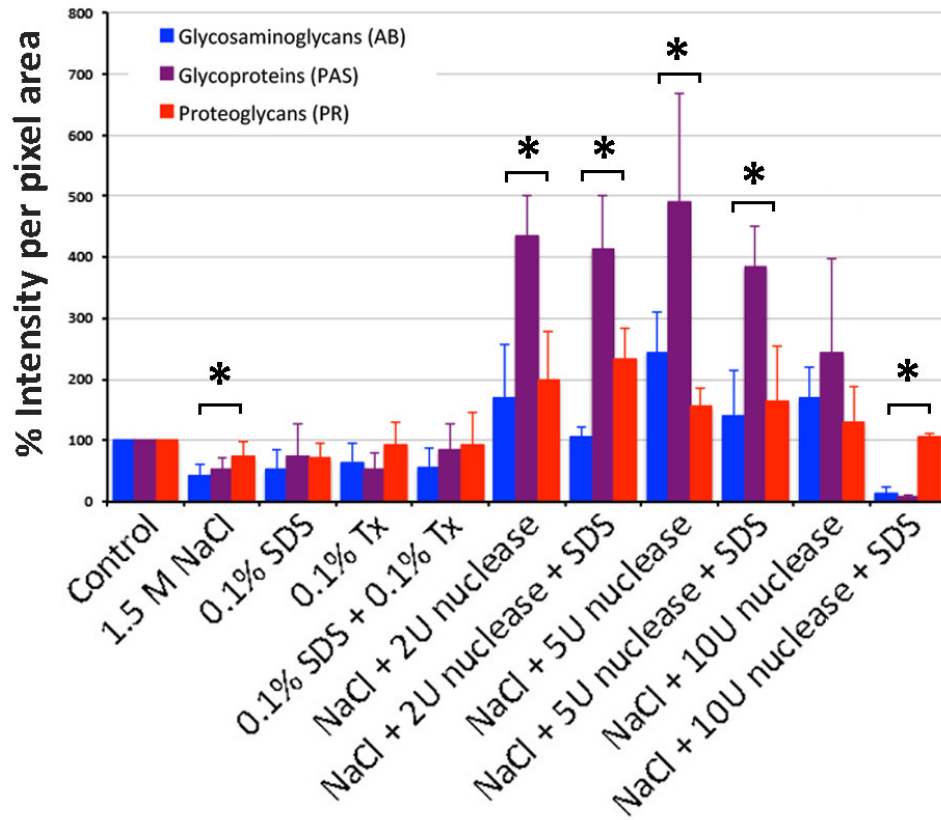

**Supplementary Figure S3.** Quantitative analysis of staining intensity of non-fibrillar ECM components (collagen, glycoprotein, GAGs) after histochemistry.  $*P < 0.05$  for multiple comparisons of all 3 components between control and treatments.

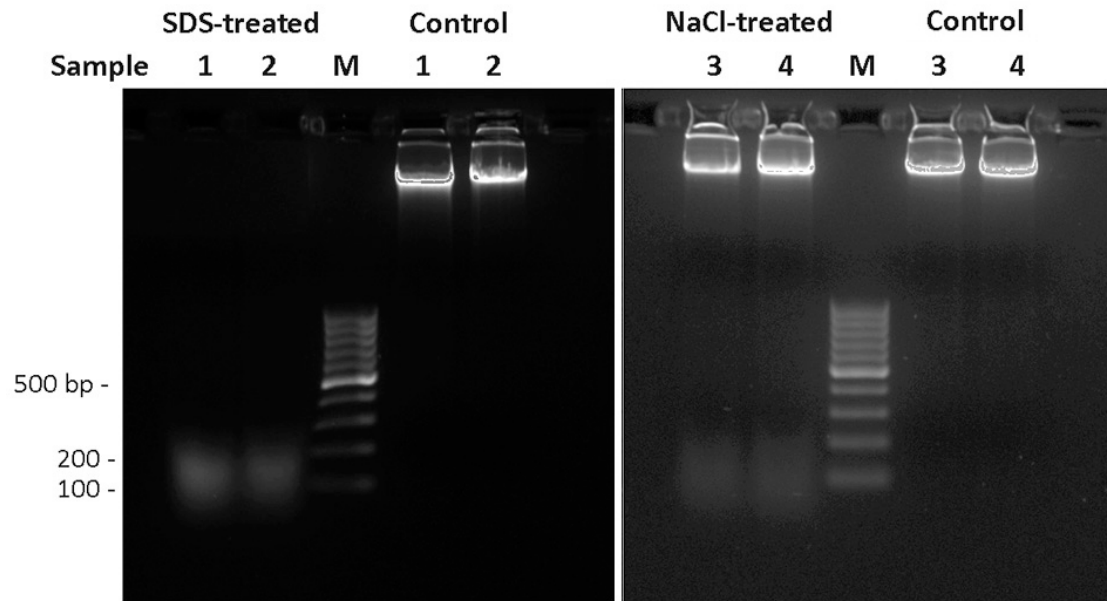

**Supplementary Figure S4.** Agarose gel electrophoresis of DNA extracted from decellularized lenticules. DNA fragments (predominantly <200 bp in size) were detected from SDS-treated lenticules whereas supercoiled DNA (>1 kb size) from control lenticules. NaCl-treated lenticules contained both <200 bp DNA fragments and supercoiled DNA.

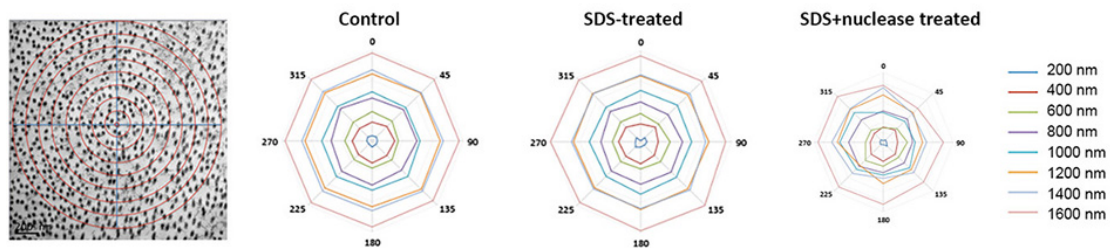

**Supplementary Figure S5. Radial distribution function analysis of fibril organization at 360° pattern.** On TEM images taken at 40,000x magnification, a reference fibril was randomly selected and overlaid with concentric circles with diameter increasing at 200 nm intervals and the number of fibrils was quantified in 8 quadrants (each spanning 45°) up to 1600 nm distance. Mean fibril numbers in different quadrants were represented with radar chart. Regular distribution pattern of collagen fibrils was observed in control and SDS-treated lenticules but not in 2N+SDS treated lenticules showing inconsistent fibril organization. Each group had n=6 sampling size. Scale bar: 200 nm.
